# Supplementary material for: Genetic variants differentially associated with rheumatoid arthritis and systemic lupus erythematosus reveal the disease-specific biology
Source: PubMed Central journal article supplement (PMC6390106; doi:10.1038/s41598-019-39132-2), 2019-02-25
Supplement: 41598_2019_39132_MOESM1_ESM.pdf [file 41598_2019_39132_MOESM1_ESM.pdf]

## Supplementary Information

### **Genetic variants differentially associated with rheumatoid arthritis and systemic lupus erythematosus reveal the disease-specific biology**

Jiwoo Lim, Kwangwoo Kim\*

Department of Biology, Kyung Hee University, Seoul 02447, Republic of Korea

\*Correspondence should be addressed to KK. ([kkim@khu.ac.kr](mailto:kkim@khu.ac.kr))

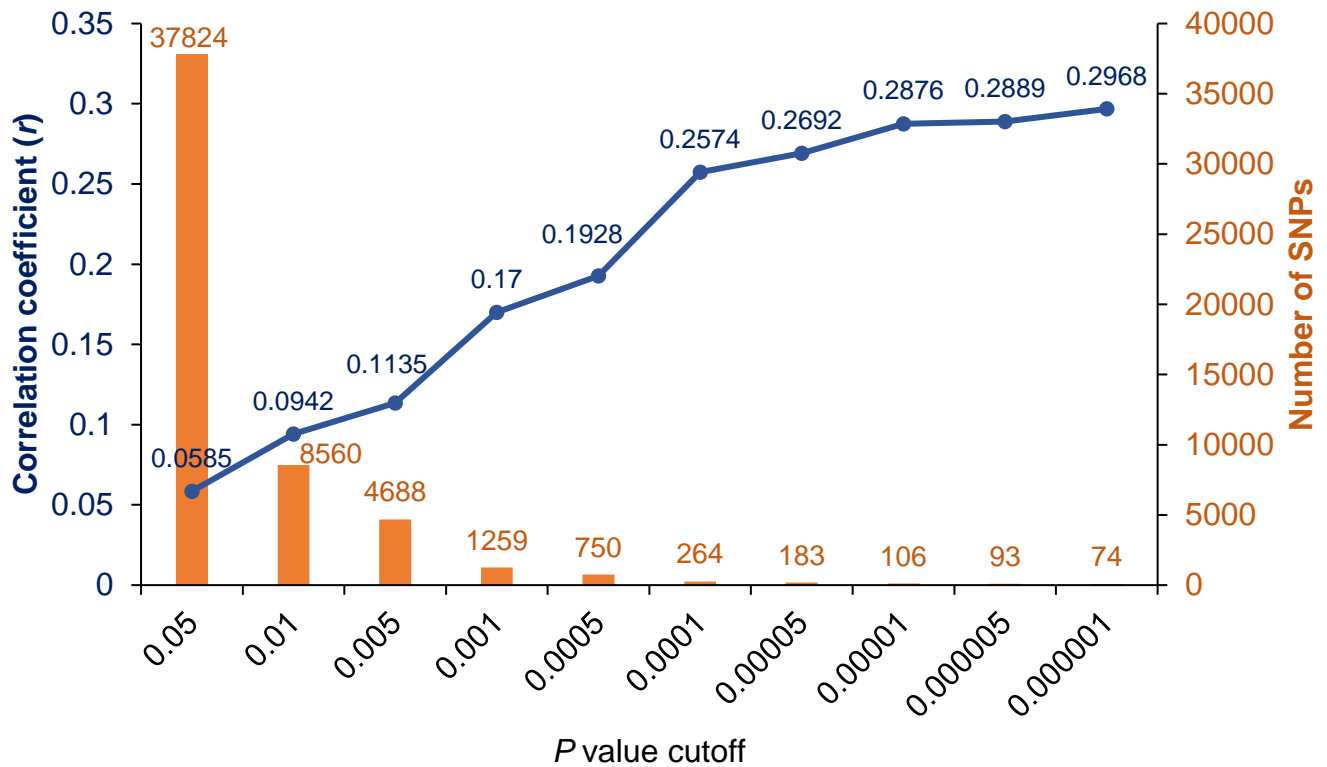

**Supplementary Figure S1. Positive correlation coefficients of  $P$  values between rheumatoid arthritis (RA) and systemic lupus erythematosus (SLE).**  $P$  values were transformed to the  $\log_{10}P$  scale with a plus or minus sign representing the positive or negative effect of a minor allele). For the correlation tests, we extracted SNPs that pass a disease association  $P$  threshold in RA or SLE. The bars present the number of SNPs used in the correlation test and the blue line shows correlation coefficients  $r$  of transformed  $P$  values in RA and SLE. All observed correlation coefficients represent positive correlations, indicating that risk alleles are shared between RA and SLE. The correlation got stronger as the  $P$  threshold was more stringent.

**Supplementary Table S1. Significant associations of 14 SNPs in a cross-disease meta-analysis but not a single-disease analysis.**

| SNP ID      | CHR | Position  | EA | NEA | Meta-analysis |       |       |          | RA   |          | SLE  |          | Location                       | Confirmed in a further analysis or other studies? |                       |
|-------------|-----|-----------|----|-----|---------------|-------|-------|----------|------|----------|------|----------|--------------------------------|---------------------------------------------------|-----------------------|
|             |     |           |    |     | OR            | OR95L | OR95U | P        | OR   | P        | OR   | P        |                                | RA                                                | SLE                   |
| rs187339910 | 1   | 2523878   | A  | G   | 1.104         | 1.066 | 1.144 | 4.48E-08 | 1.10 | 1.80E-07 | 1.15 | 0.016    | <i>MMEL1</i>                   | ○ (ref <sup>1</sup> )                             | -                     |
| rs10175798  | 2   | 30449594  | A  | G   | 1.093         | 1.065 | 1.122 | 1.72E-11 | 1.09 | 1.30E-07 | 1.11 | 2E-04    | 4.8kb 5' of <i>LBH</i>         | ○ (ref <sup>2</sup> )                             | ○ (ref <sup>3</sup> ) |
| rs668998    | 3   | 159715551 | A  | G   | 0.941         | 0.923 | 0.961 | 4.92E-09 | 0.94 | 0.00017  | 0.95 | 0.061    | CTD-2049J23.2,<br><i>IL12A</i> | -                                                 | ○ (ref <sup>4</sup> ) |
| rs77060203  | 5   | 55530306  | A  | G   | 1.096         | 1.063 | 1.131 | 8.71E-09 | 1.09 | 3.20E-07 | 1.11 | 0.001    | 1.1kb 5' of <i>ANKRD55</i>     | ○ (ref <sup>2</sup> )                             | -                     |
| rs10814140* | 9   | 34737018  | A  | G   | 0.930         | 0.911 | 0.949 | 5.75E-12 | 0.92 | 3.30E-07 | 1.01 | 0.808    | <i>FAM205A</i>                 | ○ (ref <sup>2</sup> )                             | -                     |
| rs10821949  | 10  | 63811678  | T  | C   | 1.120         | 1.085 | 1.156 | 2.43E-12 | 1.11 | 5.80E-08 | 1.15 | 1.97E-06 | <i>ARID5B</i>                  | ○ (ref <sup>2</sup> )                             | ○ (ref <sup>4</sup> ) |
| rs3852411   | 10  | 64044999  | A  | T   | 1.158         | 1.102 | 1.216 | 6.68E-09 | 1.13 | 0.00014  | 1.2  | 6.58E-05 | RP11-120C12.3,<br><i>RTKN2</i> | ○ (ref <sup>2</sup> )                             | ○ (ref <sup>4</sup> ) |
| rs7927748   | 11  | 128499574 | T  | G   | 1.092         | 1.065 | 1.121 | 9.66E-12 | 1.08 | 5.90E-07 | 1.15 | 1.39E-06 | RP11-744N12.3                  | ○ (ref <sup>2</sup> )                             | ○ (ref <sup>4</sup> ) |
| rs4766578*  | 12  | 111904371 | A  | T   | 0.913         | 0.887 | 0.94  | 6.82E-10 | 0.93 | 1.30E-06 | 0.86 | 1.13E-07 | <i>ATXN2</i><br><i>SH2B3</i>   | ○ (ref <sup>2</sup> )                             | ○ (ref <sup>4</sup> ) |
| rs8045689   | 16  | 28988269  | T  | C   | 0.919         | 0.893 | 0.946 | 8.56E-09 | 0.92 | 3.10E-05 | 0.92 | 0.003    | <i>SPNS1</i>                   | -                                                 | -                     |
| rs9308364   | 16  | 86003446  | T  | C   | 0.926         | 0.901 | 0.951 | 3.59E-08 | 0.95 | 0.00043  | 0.86 | 3.41E-07 | 47kb 3' of <i>IRF8</i>         | ○ (ref <sup>2</sup> )                             | ○ (ref <sup>4</sup> ) |
| rs901886    | 19  | 10402131  | T  | C   | 0.918         | 0.893 | 0.944 | 1.53E-09 | 0.94 | 2.30E-05 | 0.86 | 1.38E-07 | <i>ICAM5</i>                   | ○ (ref <sup>2</sup> )                             | ○ (ref <sup>4</sup> ) |
| rs74908652  | 19  | 10422972  | T  | C   | 1.135         | 1.09  | 1.181 | 5.37E-10 | 1.1  | 2.20E-05 | 1.23 | 3.08E-07 | <i>FDX1L</i>                   | ○ (ref <sup>2</sup> )                             | ○ (ref <sup>4</sup> ) |
| rs140496    | 22  | 21926456  | A  | G   | 0.92          | 0.894 | 0.948 | 2.62E-08 | 0.93 | 8.60E-05 | 0.88 | 3.52E-05 | <i>UBE2L3</i>                  | ○ (ref <sup>2</sup> )                             | ○ (ref <sup>4</sup> ) |

\* The SNPs are in LD with at least one nonsynonymous SNP ( $r^2 > 0.8$ ; distance < 500kb).

- 1 Stahl, E. A. *et al.* Genome-wide association study meta-analysis identifies seven new rheumatoid arthritis risk loci. *Nat Genet* **42**, 508-514, doi:10.1038/ng.582 (2010).
- 2 Okada, Y. *et al.* Genetics of rheumatoid arthritis contributes to biology and drug discovery. *Nature* **506**, 376-381, doi:10.1038/nature12873 (2014).
- 3 Morris, D. L. *et al.* Genome-wide association meta-analysis in Chinese and European individuals identifies ten new loci associated with systemic lupus erythematosus. *Nat Genet* **48**, 940-946, doi:10.1038/ng.3603 (2016).
- 4 Bentham, J. *et al.* Genetic association analyses implicate aberrant regulation of innate and adaptive immunity genes in the pathogenesis of systemic lupus erythematosus. *Nat Genet* **47**, 1457-1464, doi:10.1038/ng.3434 (2015).

CHR=chromosome location, EA=effect allele, NEA=non-effect allele, OR=odds ratio, OR95L=95% confidence interval lower bound of odds ratio, OR95U=95% confidence interval upper bound of odds ratio, P=P-value, RA=rheumatoid arthritis, SLE=systemic lupus erythematosus.

**Supplementary Table S4. Enrichments of disease-specific variants within H3K4me3 histone modification marks in various cell types.**

| Cell-type                             | <i>P</i> from RA-specific variants | <i>P</i> from SLE-specific variants | Subtype                             |
|---------------------------------------|------------------------------------|-------------------------------------|-------------------------------------|
| Treg primary cells                    | <1x10 <sup>-5</sup>                | 9.9x10 <sup>-4</sup>                | Hematopoietic                       |
| CD4+ memory primary cells             | 6.2x10 <sup>-4</sup>               | 0.149                               | Hematopoietic                       |
| CD4+ naive primary cells              | 8.1x10 <sup>-4</sup>               | 0.143                               | Hematopoietic                       |
| CD8+ naive primary cells              | 0.011                              | 0.036                               | Hematopoietic                       |
| Mucosa, colon                         | 0.030                              | 0.053                               | Gastrointestinal                    |
| Mesenchymal stem cells (bone marrow)  | 0.133                              | 0.524                               | Hematopoietic                       |
| CD8+ memory primary cells             | 0.173                              | 0.124                               | Hematopoietic                       |
| Muscle satellite cultured cells       | 0.221                              | 0.059                               | Musculoskeletal, endocrine & others |
| Mesenchymal stem cells (adipose)      | 0.232                              | 0.730                               | Musculoskeletal, endocrine & others |
| Cingulate gyrus                       | 0.241                              | 0.350                               | Brain                               |
| Chondrocytes (mesenchymal stem cells) | 0.344                              | 0.569                               | Musculoskeletal, endocrine & others |
| Rectal smooth muscle                  | 0.362                              | 0.144                               | Gastrointestinal                    |
| Mucosa, duodenum                      | 0.411                              | 0.219                               | Gastrointestinal                    |
| CD19+ primary cells                   | 0.437                              | <1x10 <sup>-5</sup>                 | Hematopoietic                       |
| Adipocyte (mesenchymal stem cells)    | 0.462                              | 0.687                               | Musculoskeletal, endocrine & others |
| Skeletal muscle                       | 0.463                              | 0.171                               | Musculoskeletal, endocrine & others |
| Adult kidney                          | 0.490                              | 0.086                               | Musculoskeletal, endocrine & others |
| Mid-Frontal lobe                      | 0.521                              | 0.795                               | Brain                               |
| CD34+ primary cells                   | 0.614                              | 0.130                               | Hematopoietic                       |
| Stomach smooth muscle                 | 0.637                              | 0.661                               | Gastrointestinal                    |
| Substantia nigra                      | 0.653                              | 0.982                               | Brain                               |
| Smooth muscle, colon                  | 0.667                              | 0.918                               | Gastrointestinal                    |
| Mucosa, stomach                       | 0.673                              | 0.250                               | Gastrointestinal                    |
| CD3+ primary cells                    | 0.702                              | 0.572                               | Hematopoietic                       |
| Mobilized CD34+ primary cells         | 0.703                              | 0.002                               | Hematopoietic                       |
| Pancreatic islets                     | 0.781                              | 0.992                               | Musculoskeletal, endocrine & others |
| Adult liver                           | 0.795                              | 0.243                               | Gastrointestinal                    |
| Adipose nuclei                        | 0.803                              | 0.784                               | Musculoskeletal, endocrine & others |
| CD34+ cultured cells                  | 0.865                              | 0.100                               | Hematopoietic                       |
| Mucosa, rectum                        | 0.866                              | 0.792                               | Gastrointestinal                    |
| Inferior temporal lobe                | 0.904                              | 0.283                               | Brain                               |
| Anterior caudate                      | 0.984                              | 0.846                               | Brain                               |
| Duodenum smooth muscle                | 0.991                              | 0.324                               | Gastrointestinal                    |
| Hippocampus middle                    | 0.993                              | 0.590                               | Brain                               |

**Supplementary Table S5. Enrichments of disease-specific variants within enhancer in various cell and organ types.**

| Cell or organ type                        | <i>P</i> from RA-specific variants | <i>P</i> from SLE-specific variants | Classification               |
|-------------------------------------------|------------------------------------|-------------------------------------|------------------------------|
| thymus                                    | 0.005                              | 0.342                               | Organ                        |
| dendritic cell                            | 0.010                              | 0.339                               | Hematopoietic cell-types     |
| natural killer cell                       | 0.011                              | 0.210                               | Hematopoietic cell-types     |
| lung                                      | 0.015                              | 0.471                               | Organ                        |
| T cell                                    | 0.027                              | 0.567                               | Hematopoietic cell-types     |
| blood                                     | 0.063                              | 0.001                               | Organ                        |
| circulating cell                          | 0.079                              | 0.051                               | Hematopoietic cell-types     |
| neutrophil                                | 0.109                              | 0.913                               | Hematopoietic cell-types     |
| basophil                                  | 0.179                              | 0.018                               | Hematopoietic cell-types     |
| monocyte                                  | 0.231                              | 0.010                               | Hematopoietic cell-types     |
| meninx                                    | 0.248                              | 0.068                               | Organ                        |
| lymphocyte of B lineage                   | 0.253                              | 0.059                               | Hematopoietic cell-types     |
| fibroblast of gingiva                     | 0.262                              | 0.730                               | Non hematopoietic cell-types |
| stromal cell                              | 0.267                              | 0.891                               | Non hematopoietic cell-types |
| acinar cell                               | 0.285                              | 0.447                               | Non hematopoietic cell-types |
| prostate gland                            | 0.364                              | 1.000                               | Organ                        |
| epithelial cell of esophagus              | 0.375                              | 1.000                               | Non hematopoietic cell-types |
| hepatocyte                                | 0.414                              | 0.553                               | Non hematopoietic cell-types |
| skin fibroblast                           | 0.426                              | 0.833                               | Non hematopoietic cell-types |
| liver                                     | 0.446                              | 0.478                               | Organ                        |
| spleen                                    | 0.452                              | 0.190                               | Organ                        |
| blood vessel                              | 0.480                              | 1.000                               | Organ                        |
| cardiac myocyte                           | 0.481                              | 1.000                               | Non hematopoietic cell-types |
| eye                                       | 0.491                              | 1.000                               | Organ                        |
| respiratory epithelial cell               | 0.521                              | 0.109                               | Non hematopoietic cell-types |
| tonsil                                    | 0.553                              | 0.194                               | Organ                        |
| keratinocyte                              | 0.555                              | 0.742                               | Non hematopoietic cell-types |
| intestinal epithelial cell                | 0.594                              | 1.000                               | Non hematopoietic cell-types |
| fibroblast of choroid plexus              | 0.601                              | 1.000                               | Non hematopoietic cell-types |
| tendon cell                               | 0.602                              | 0.352                               | Non hematopoietic cell-types |
| granulocyte                               | 0.628                              | 0.016                               | Hematopoietic cell-types     |
| ciliated epithelial cell                  | 0.640                              | 0.421                               | Non hematopoietic cell-types |
| pericyte cell                             | 0.647                              | 1.000                               | Non hematopoietic cell-types |
| testis                                    | 0.650                              | 0.304                               | Organ                        |
| fibroblast of tunica adventitia of artery | 0.655                              | 0.799                               | Non hematopoietic cell-types |
| mesothelial cell                          | 0.664                              | 0.800                               | Non hematopoietic cell-types |
| enteric smooth muscle cell                | 0.666                              | 1.000                               | Non hematopoietic cell-types |
| lens epithelial cell                      | 0.674                              | 1.000                               | Non hematopoietic cell-types |
| heart                                     | 0.679                              | 1.000                               | Organ                        |
| macrophage                                | 0.695                              | 0.598                               | Hematopoietic cell-types     |
| hair follicle cell                        | 0.697                              | 0.203                               | Non hematopoietic cell-types |
| smooth muscle cell of prostate            | 0.698                              | 1.000                               | Non hematopoietic cell-types |
| mast cell                                 | 0.703                              | 0.437                               | Hematopoietic cell-types     |

|                                        |       |       |                              |
|----------------------------------------|-------|-------|------------------------------|
| astrocyte                              | 0.709 | 0.864 | Non hematopoietic cell-types |
| urothelial cell                        | 0.728 | 0.860 | Non hematopoietic cell-types |
| epithelial cell of Malassez            | 0.736 | 0.858 | Non hematopoietic cell-types |
| myoblast                               | 0.788 | 0.623 | Non hematopoietic cell-types |
| vascular associated smooth muscle cell | 0.788 | 0.906 | Non hematopoietic cell-types |
| epithelial cell of prostate            | 0.806 | 1.000 | Non hematopoietic cell-types |
| mammary epithelial cell                | 0.810 | 0.912 | Non hematopoietic cell-types |
| large intestine                        | 0.853 | 1.000 | Organ                        |
| preadipocyte                           | 0.881 | 0.845 | Non hematopoietic cell-types |
| gingival epithelial cell               | 0.895 | 0.807 | Non hematopoietic cell-types |
| fat cell                               | 0.901 | 1.000 | Non hematopoietic cell-types |
| sensory epithelial cell                | 0.915 | 0.970 | Non hematopoietic cell-types |
| blood vessel endothelial cell          | 0.940 | 0.917 | Non hematopoietic cell-types |
| skeletal muscle cell                   | 0.944 | 0.679 | Non hematopoietic cell-types |
| brain                                  | 0.953 | 0.959 | Organ                        |
| mesenchymal cell                       | 0.965 | 0.961 | Non hematopoietic cell-types |
| kidney epithelial cell                 | 0.996 | 0.397 | Non hematopoietic cell-types |
| amniotic epithelial cell               | 1.000 | 0.787 | Non hematopoietic cell-types |
| bronchial smooth muscle cell           | 1.000 | 1.000 | Non hematopoietic cell-types |
| cardiac fibroblast                     | 1.000 | 0.267 | Non hematopoietic cell-types |
| chondrocyte                            | 1.000 | 0.451 | Non hematopoietic cell-types |
| corneal epithelial cell                | 1.000 | 1.000 | Non hematopoietic cell-types |
| endothelial cell of hepatic sinusoid   | 1.000 | 0.739 | Non hematopoietic cell-types |
| endothelial cell of lymphatic vessel   | 1.000 | 1.000 | Non hematopoietic cell-types |
| fibroblast of lymphatic vessel         | 1.000 | 0.144 | Non hematopoietic cell-types |
| fibroblast of periodontium             | 1.000 | 0.704 | Non hematopoietic cell-types |
| fibroblast of pulmonary artery         | 1.000 | 0.500 | Non hematopoietic cell-types |
| fibroblast of the conjunctiva          | 1.000 | 1.000 | Non hematopoietic cell-types |
| hepatic stellate cell                  | 1.000 | 1.000 | Non hematopoietic cell-types |
| iris pigment epithelial cell           | 1.000 | 1.000 | Non hematopoietic cell-types |
| keratocyte                             | 1.000 | 1.000 | Non hematopoietic cell-types |
| melanocyte                             | 1.000 | 0.833 | Non hematopoietic cell-types |
| neuron                                 | 1.000 | 1.000 | Non hematopoietic cell-types |
| neuronal stem cell                     | 1.000 | 1.000 | Non hematopoietic cell-types |
| osteoblast                             | 1.000 | 0.911 | Non hematopoietic cell-types |
| placental epithelial cell              | 1.000 | 1.000 | Non hematopoietic cell-types |
| reticulocyte                           | 1.000 | 1.000 | Non hematopoietic cell-types |
| retinal pigment epithelial cell        | 1.000 | 1.000 | Non hematopoietic cell-types |
| smooth muscle cell of the esophagus    | 1.000 | 1.000 | Non hematopoietic cell-types |
| smooth muscle cell of trachea          | 1.000 | 0.333 | Non hematopoietic cell-types |
| trabecular meshwork cell               | 1.000 | 1.000 | Non hematopoietic cell-types |
| uterine smooth muscle cell             | 1.000 | 0.626 | Non hematopoietic cell-types |
| adipose tissue                         | 1.000 | 0.581 | Organ                        |
| esophagus                              | 1.000 | 1.000 | Organ                        |
| female gonad                           | 1.000 | 1.000 | Organ                        |
| gallbladder                            | 1.000 | 0.384 | Organ                        |

---

|                         |       |       |       |
|-------------------------|-------|-------|-------|
| internal male genitalia | 1.000 | 1.000 | Organ |
| kidney                  | 1.000 | 1.000 | Organ |
| lymph node              | 1.000 | 0.404 | Organ |
| olfactory region        | 1.000 | 1.000 | Organ |
| pancreas                | 1.000 | 1.000 | Organ |
| parotid gland           | 1.000 | 1.000 | Organ |
| penis                   | 1.000 | 1.000 | Organ |
| placenta                | 1.000 | 1.000 | Organ |
| salivary gland          | 1.000 | 1.000 | Organ |
| skeletal muscle tissue  | 1.000 | 0.452 | Organ |
| skin of body            | 1.000 | 1.000 | Organ |
| small intestine         | 1.000 | 1.000 | Organ |
| smooth muscle tissue    | 1.000 | 1.000 | Organ |
| spinal cord             | 1.000 | 0.555 | Organ |
| stomach                 | 1.000 | 1.000 | Organ |
| submandibular gland     | 1.000 | 1.000 | Organ |
| throat                  | 1.000 | 1.000 | Organ |
| thyroid gland           | 1.000 | 1.000 | Organ |
| tongue                  | 1.000 | 0.413 | Organ |
| umbilical cord          | 1.000 | 1.000 | Organ |
| urinary bladder         | 1.000 | 1.000 | Organ |
| uterus                  | 1.000 | 0.481 | Organ |
| vagina                  | 1.000 | 0.326 | Organ |

---
